# Supplementary material
Source: PubMed Central journal article supplement (PMC3026082)

## Supplemental Information

### Figures legends for supplemental figures

**Figure S1 Sequence alignment of Pdr5p with other fungal transporters.** Pdr5p and 19 sequences from the PFamA database are aligned. The numbers above the columns are the absolute alignment positions. They are not residue numbers. The alignment begins with amino acid 149 of Pdr5p.

**Figure S2 Structural-based sequence alignment of nucleotide binding domains.** The NBDs of 20 structures from the Protein Databank (PDB) and the two NBDs from Pdr5p are organized in a structure-based alignment. Major sequence motifs are indicated above the columns. The ABC signature motif is designated as the C loop in this figure. The sequence names of proteins other than Pdr5p are the PDB codes.

**Figure S3 Hydrophobicity profiles of Pdr5p and Sav1866.** The Kyte-Doolittle scale was used on the entire alignment (left) and on Pdr5p and Sav1866 alone (right). The upper graphs are of TMD1 and the lower are of TMD2. The red circle indicates the misalignment between Pdr5p and Sav1866.

**Figure S4 Hydrophobicity profiles of Pdr5p and mouse Pgp.** The Kyte-Doolittle scale was used on the entire alignment (left) and on Pdr5p and Mouse Pgp alone (right). The upper graphs are of TMD1 and the lower are of TMD2.

**Figure S5 Separation of the NBDs in the open conformation.** The NBDs are further apart in the open conformation than in the closed conformation. The distance between residues G338 and S1039 increases from 5.9 Å to 24 Å in the open conformation.

**Figure S6 The portal between helices 3 and 4.** The open conformation allows access to the substrate-binding pocket of Pdr5p. Helices 3 and 4 are numbered. Measurements were made from the same pair of residues for each conformation.

**Figure S7 Pdr5p as a true dimer.** (A) A schematic showing the relationship of major motifs around the two ATP-binding sites. Letters in Figure S7A designate Walker A [A], Walker B [B], the C-loop [C], and the D-loop [D]. The sequences of the motifs are shown. White letters are canonical residues and black letters are aberrant residues. All aberrant residues surround ATP site 1. The aberrant arginine from the D-loop of ATP site 2 appears to interact only with ATP site 1 (see text for details). (B) A proposed true Pdr5p dimer. Two Pdr5p molecules (green and magenta) are opened into N-terminal and C-terminal halves. The N-terminal half of one monomer associates with the C-terminal half of the other. (C) A schematic depicting the events leading to a true Pdr5p dimer. After opening, one monomer rotates on top of the other so that N-terminal and C-terminal domains are associated.

**Figure S8 Pdr5p TMDs in the open and closed conformations.** (A) The closed conformation model based on Sav1866. The TMDs are opened to the extracellular environment. (B) The open conformation model based on mouse Pgp. The TMDs are closed to the extracellular environment. Numbers in both parts indicate the residues tested by mutagenesis (see text for details).

**Figure S9 Sequence alignment of the TMDs of Pdr5p and mouse Pgp.** The alignments were corrected for hydrophobicity.

**Figure S10 Sequence alignment of the TMDs of Pdr5p and Sav1866.** The alignments were corrected for hydrophobicity.

**Figure S11 MIC assay of TMD Mutants.** Strains were tested on tritylimidazole (Trityl). WT denotes wild-type and  $\Delta pdr5$  denotes the pdr5 deletion mutant.

**Figure S12 Interfaces between TMDs and NBDs.** (A) Sav1866p, (B) the Pdr5p open conformation model based on Sav1866p, (C) Pgp, and (D) the Pdr5p closed conformation model based on Pgp.

# Supplementary Figure S1

## Multiple Sequence Alignment of Pdr5

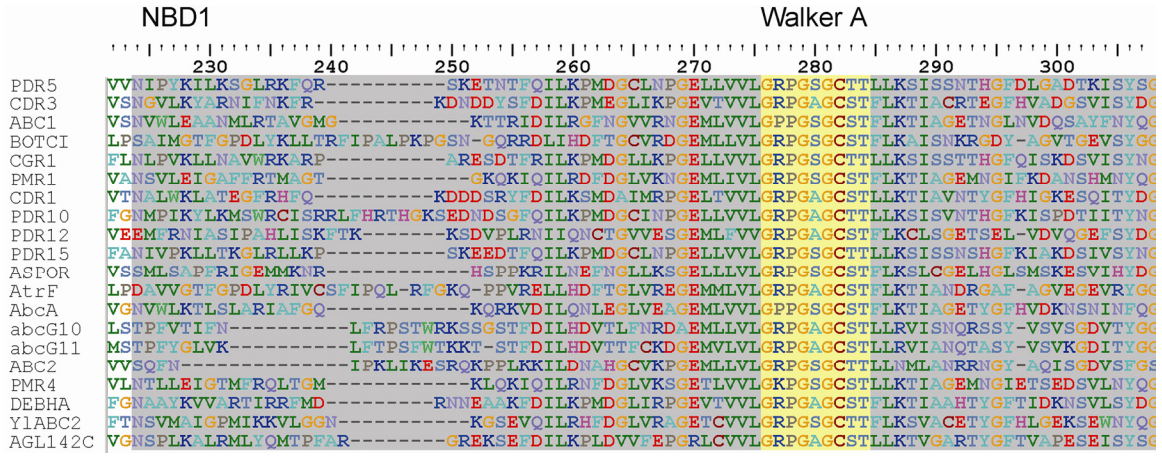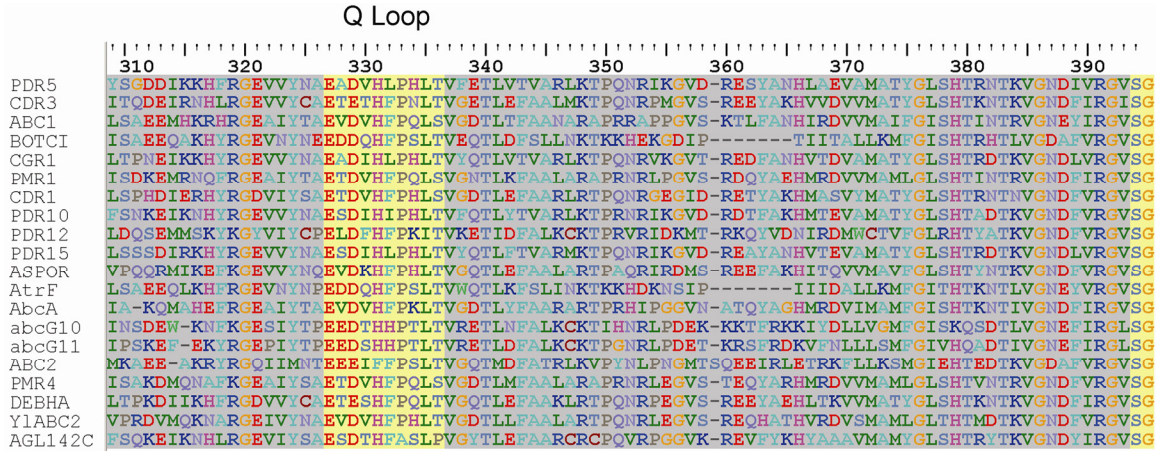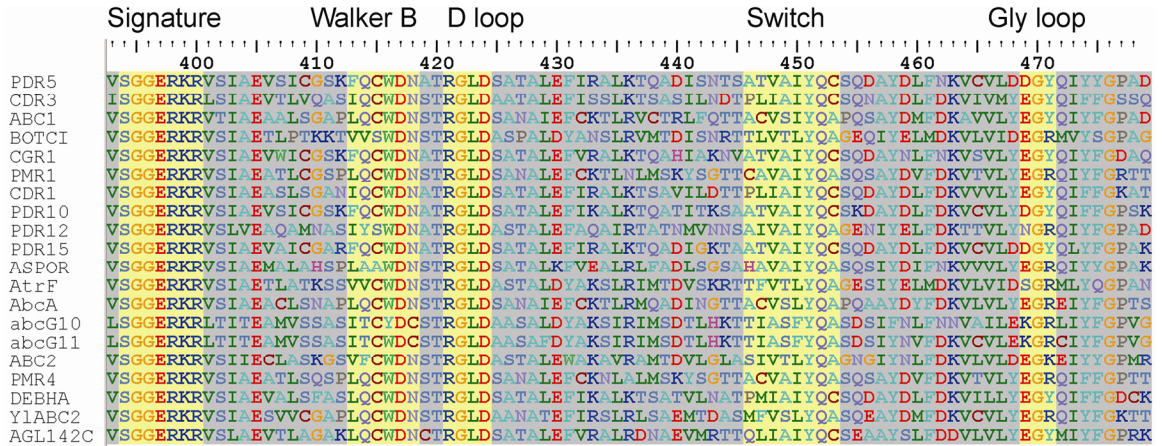



480 490 500 510 520 530 540 550 560

PDR5 KAKKVFEDMGVYCPSPQTTADFLTSVTSPSERT---LNKMDLKKGIHIPQTPKEMNDYVWKSPNYKELMKVEVDQRLLN-DEEAS---

CDR3 RAAAYFKKMGVYCPDRQTTADFLTSVTSIPAERI---INKEYLDRGKIKVQTPIDMVEYWHNSEYKQLREIIDEYLDNCEYNDQ---

ABC1 EAKQYFVNLGFCPCPAR-TTDFLTSMTADPHERI---VRPGFEGK---APRTPEEFAIAWENSABEYALQADIEYKSSHPINQPD---

BOTCI DAKKVFERIGYVCPKRTTADFLTACTDPAERR---FOKDFEGP---IPKGPVELEKAFRESEDYRLLOQEDVESYERMLHETDHAD---

CGR1 HAKVYFQRMGVCPPKRTIIPDFLTSVTSIPAERR---INKEYLDRGKIKVQTPIDMVEYWHNSEYKQLREIIDEYLDNCEYNDQ---

PMR1 EAREYFVTMGVYCPDRQTTADFLTSVTSIPAERV---VKPGFEGK---VPRTPDFEFAKGNKNSAAYKELQKEIDDYNTQYPTGGES---

CDR1 KAKYVFEDMGVYCPDRQTTADFLTSVTSIPAERE---PLPGYEDK---VPRTPDFEFAKGNKNSAAYKELQKEIDDYNTQYPTGGES---

PDR10 QAKKVFQRMGVCPEPQTTADFLTSVTSIPAERI---KDKMVKHGIIMIQTAYEMNQYWIQSEEVKQLQVQVNHKLDT-DSSQQ---

PDR12 KAVGYFQRMGWKPNRMTSAEFLTSVTVDFENRTLDIKPGYEDK---VPKSSSEFEEYWLNSEDYQELLRTYDDYQSRHFVNET---

PDR15 DAKKVFQDMGVCPPRQTTADFLTSVTSIPAERI---ISKEFIEKGTTRVPQTPKDMAEYWLQSESYKLNLIKIDIDSTLEK-NTDEA---

ASPOR DAKSYFERQGWVCPDRQTTADFLTSVTSIPAERK---ARPGMENQ---VPRTPAEDEFAAYWRKSPQYKQLMSEI SHYEQEHPLEEEEGDA---

AtrF KAREYFVNLGFCPCPKSTTADFLTSVTSIPAERK---FQPGREAS---TPKTPPEELEAVFRNSEYTKTICDEVASYEKKLQTDQED---

AbcA MAKHYFLQMGVYCPDRQTTADFLTSMTSHLERV---VQPGYEDR---VPRTPDFEFAARWKAQSPQRAQLMHIKSYNAKFFALDGEY---

abcG10 LAKQYFLDLGFCDECPKSTPDLFGVTVNPQERK---VRPGFEGR---APETSSDFEKAWKSSDLYQVMLQQOLEYEKKIELE-QPS---

abcG11 MAKQYFMSLGFCECPKSTPDLFGVTVNPQERI---IKKGFEGR---TPETSADFEAWKNSDIYRDQLOEQEYEBELIERT-QPK---

ABC2 EARPFMEMLGFCDDGANVADFLGVTVPTEPK---VRDEMCLK---FPRTAGAIRSEYEQTAVHDQATEYNY-YP---TTEBAQTK---

PMR4 EARPYFEDMGVYCPDRQTTADFLTSVTSIPAERV---IRPGFEGR---APITPDDFAEAWKSTARAKLGEIEYENYKPYKGGSS---

DEBHA QAKLYFLFMGVCPCPQTTADFLTSVTSIPAERV---VRPGYENK---VPRTPPEEFTYQWNSPERKALLGEIDDYLNKNTDNEER---

Y1ABC2 EAKQYFLDLGFCDCADRQTTADFLTSVTSIPAERI---IRPGVESR---VPRTPDDEFEKWLSEARQLLDIDEFNNEFVGGPA---

AGL142C LAKGYFLRMGWVCPDRQTTADFLTSVTSIPAERK---SQPGYEDK---VPRTPAREFYEWLRSPEHAVAMKQIQRIIAEAKTDAA---

TMD 1

570 580 590 600 610 620 630 640 650

PDR5 --REAIKEAHIKAKQSKRARPSSPYTVSMMQVKLLIRNMWRLLRNIGFTLMLIGCSMLILSMPTKIM--KKDTSTTYFRSS---

CDR3 --KQKIFEANNAKKAKHTYKSSSYTVSLPMQVRIIMKRWDRMRDIIIVPLSTVAGNIAMLILSSVFNL---QPNSSSYFRUS---

ABC1 --AEAFRKSRAAQGRGQRPNSPYTVSLTQQTKLCLWRGKRLLDPTLTVGLAANTLM LVISSIFNL---QMTSSFPQRJA---

BOTCI D-ARQFKASVEETKSKTVGPRSPYTVSFRQVLLTKREVELTLDKTYLTKTIIISNLIYGLSHHQ---SSNTLGNFRJG---

CGR1 --KEEIKEAHIKAKQSKRARPSSPYTVSMMQVKLLIRNMWRKNSASVTLQVFNAMMILSMPTKIQ--KSSADTYFRJA---

PMR1 --FQQFVESRKAQSKGQRAKSPYTVSVLBOVQICVTRGQRRLKSDYSLTISALIGNTIMLIVGSVYQL---PDDVTSFYSRJA---

CDR1 --RETYRESHVAKQSNTRPASPYTVSLPMQVRGV RNLRMKDPSIPIFSVFGQIVMLLILSSVFNL---SQTTGSFYRJA---

PDR10 --REQIKNAHIKAKQSKRARPSSPYTVSLTQVQLILIRDWRIKDPSIQLTVLSHAMLILSMPTKVM--LSTTTTTYFRJA---

PDR12 --RDRLDVAKHQRQQGQRENSQVFNWLTQVLCMIRGQRKDDSTTKV LSSLIKLIIISMFKIDDKSQSTAGYSRJA---

PDR15 --RNIIIRDAAHKAQAKRAPPSSPYVNVNMMQVKLLIRNMWRMKSASVTLWQVIGNSVMAMILSMPTKVM--KKDTSTTYFRJA---

ASPOR DALATFQOKKREIQAKHTRPQSPYLLSVMQIKLNMKRNQRVWADISSTVSTVISQIIMLIISSVYGT---PD TAGFTAKJA---

AtrF D-TRRFQKTVAQSKSRIVSKSSYTVSFRQVLCVQREWLLW-DKTSLYTKFIIISNLIYSSLYGT---SLDTSGNFRJG---

AbcA --LDKFKQSRRAQQAQQRVSSPYTVSLVQOVKLCWRGQRKLDPSVTISSLFNTIISLIVISIFYNL---KDTSTFPQRJA---

abcG10 S-TN-FIEQIRNENSKTNPKSIYTTSTHTQVRLI RNSQIIWDRRLISKISIIIVQTVIASLFTNM---KSDVTLNFRJG---

abcG11 K-VA-FVQVRRVANSKTNFKKSQYTTSTVTVQVILKRNKLVLDKQMSKLSVLIQSVIASLFTNM---DDDTGLNFRJG---

ABC2 K-TKLFQEGIAHEKDKGLPASSSPYTVSHTQVTRCIRKQGIIVDKTTFIKQSTIVQLIAGSLYNA---PDTTGLNFRJG---

PMR4 --YDAFVDARRAAQAKSQRVKSYPYTVSVRQKISLCVTRGQRRLDYSLTATLIGNFIMSLIVGSVFNL---PDTSSTFYRJA---

DEBHA --LQQFKDANHTKQSNHLRASPYPYTVSMMQVKLLIRNMRTKDPSTITIGVFNIVMLIISIFYNL---EDTGSFYRJA---

Y1ABC2 --LDNFMGLRKDAQAKHTRVQSPYTVSFMQTRLCWRGLRIKDMSTDIITVFNIVMLVLSMPTNM---PQTTESFYRJA---

AGL142C --REQLRDHHIVRQARHVKSSPYTVSFMQRIIVDRNWQRRLDPSVLSIVATSIMLILSCLLNL---KPDNTSLNFRJG---

660 670 680 690 700 710 720 730

PDR5 AMPTAILNAPSSSLEIFSLERPITEKHRTYSLHPSDAPASVLSSEIPSKLII VCPNIIFFFLVD RRNGGVPTFFLLINIVIA---

CDR3 VMTYALLNAPSSSLEIFSLERIVOKHREKALPPMDIIGSIIISDPLKVVCSVLPNLILFMVFKREPGAEFFLLISCS---

ABC1 LLFPACLLNGPLAALBILILAQREIVEKHDRALHPSERVSMCLDMPKVENIVPNLVTMAMLRREPGAEFFLLISGAT---

BOTCI TLEFSILLGWLGSLMLKVGCRBEIISRHKDAFRPSVVV RVVQDPLLLLQVPPSIVVFTITGLDQKRIIVLVIILT---

CGR1 AMPTAILNAPSSSLEIFSLERPITEKHRTYSLHPSDAPASVLSSEIPPKIVTILFNIIFFFLVNRDAGRFFFLINIVIA---

PMR1 LLFPVLLNAPSSSLEIFSLERPIVEKHKKALRPSHPPEEISSMCLDMPKILNITFNVTLTMTGLRQAGAEFFMLFSVIT---

CDR1 AMPTAVLNAPSSSLEIMSLERPIVEKHKKALRPSDELASIISELVVKLMSMSPNFTVMVFRRRRPPGAEFFVLMCIWC---

PDR10 AMPTAILNAPSSSLEIFSLERPIVEKHKKALRPSDAPASVLSSEIPPKLATVTPNIPYFLNLRKRDGAEFFLLIINIIT---

PDR12 MLPTVLLNAPSSSLEIFSLERIGNSSSREPIVVKHKSISMHLSESLQEIIEPTKVIVILCLITWIPMKEGAEFFILLLTV---

PDR15 AMPTAILNAPSSSLEIFSLERPIVEKHKKALRPSDAPASVLSSEIPPKLATVCPNIIFFFLVD RRNGGVPTFFLLINIVIA---

ASPOR TLEFPVLLMALIMGEINSLSQRPIVEKHNSTAFHPATEIACVVS DIPVKVI VVFNLILFLALGHRSAQFFLLLVTVIV---

AtrF ALFPYSILLGWLGLELMPVTRIVRHKEAFTRPSVSI RVMVDPAIFCMVVPPTIIMFTMLGDLVASKFIPLFLVYTT---

AbcA LLFPVLLMALCELEMLTLAQRPIIEKHSRHALHPSERFSSMIMDLPKILNITSNIVLTMTMLRREPGAEFFVPTSIL---

abcG10 RIYAAILNAPVSAEELGLTYRRILQKHSAMRPSLHI MVITDIPLTAIQVTIISVIVFTMGLQVDAKFTIILPTIPGS---

abcG11 AILSVIAPNALSISEMMPYRRVLOKHKKALRPSLHI QVVTDIPLTAIQVLSIIATFMGLQVDAKFTIICITLLGA---

ABC2 SCTLNLLNALSISEMMPYRRVLIKHKSNRHPAFCIQAIDIPVILVQVLSLILFTMVLMTSAGHPTWIIIVAT---

PMR4 LLFPVLLMALCELEMLTLAQRPIVEKHKRAPHHPAEALSMCLDVPKIANSFTNIPLFTMTHLRREGGPFTTWIPLVLT---

DEBHA AMPTAVLNAPSSSLEIFSLERPIVEKHKKALRPSDAPASIIITELPKITCLAFNLVFMVFRRRRAGNFFFLVNVTA---

Y1ABC2 LLFPAILNAPASILEILSLERPIVDKQRNAMHPADLAIITTFPTKTLIVSVLTIPTMNLRRREVPPTIPLVSLLC---

AGL142C ALPTVLLNAPSSSLEIMSLERIVKHKSNRHPAFCIQAIDIPVILVQVLSLILFTMVLMTSAGHPTWIIIVAT---



740 750 760 770 780 790 800 810 82

PDR5 INIV VFMMSHL RCVSLTKTLE M VPSM LLL LSM TGF IPKKILR--WSKWIW INPLAYL ESLLINE HGIK PC -  
CDR3 IS CSTL MSHL RTIGATNSL E MTPSSLLLT LSTSGE IPVT MLE---WCKWIRWVNPVAYE LISNE HGRVDCS-  
ABC1 ISFIVL MSMM RTI SMSRSLSQ M VPM A I L I L I I T G F V I P L D M L P---WCRWLW NIDILAYS ESLLINE HGRQRTCT-  
BOTCI F I L T T I C I T S L R M F A L S P S I D D V R T S G I L N L L I I T G F V I P K P Q L V S E I W G W L Y I N P L S Y S E A G I S D E F N K I T C A P  
CGR1 INVI VFMSHL RCVSLTKTLE M VPSM LLL LSM TGF IPRTKMLG---WSKWIW INPLAYL ESLMVNE HDRRIPC-  
PMR1 FSI VFTLMSMI RTI SVSRTLSQLVPA I L I L L V I T G F T I P T R M L G---WSRWMN IDP VAYE S E T L I V N E H G R I P P C I P  
CDR1 MCIWCTVMSHL RSI S V S T S I S M T P A T V L L L M V I T G F V I P T P S M L G---WSRWMN IDP VAYE S E T L I V N E H G R I P P C I P  
PDR10 INIIVVFMSHL RCI S V S K T L P Q M V P S V L L L A F A M T G F I P R V O M L G---WSKWIW S I M P L S Y L E S L M I N E H G R I P P C I P  
PDR12 F L L I V Q Q C T S F I K V A T M S K S V D A H V S G L V M L C V I A G F V L P I Q E M H H---W I R W L H I N P L T Y A S E S L V S T E H H R E M L C S -  
PDR15 INVI VFTLHL RCVSLTKTLE M VPSM LLL LSM TGF IPRTKMLG---WSIWIW INPLAYL ESLMINE HDRRIPC-  
ASPOR V T I V M V M S V R T M A I T Q T V S Q M L A G I L I L L I V T G F V L P V P S M H P---W E W I H I L N P I Y A E M L I A N E H G R D I C S -  
AtrF F V I T T F S I T S L R M P A A L S P T I D D V R S E I L N I L V I V S V I P K Q L I D G S I W G W L F V N P I A Y S E A V L T N E S D R I M D C P  
AbcA F S I L L T L M S M F R S M S L S R S L V Q L P S A V L L L L S M T G F I P T G M L G---W R W I A I N P I S Y S E S L M I N E H N R D P C M -  
abcG10 T I F S T L S M V A T R L N L S P S L V S Q N I L N V I L M T Y G G Y S I P K N K M H P---W S W Y W I N P S P K A L M A N E R G D M N T C D  
abcG11 I L L P A S L C T A L R C F G Y L C P S M I A Q N I S N V I I M L T T S G T T I P I P K M H P---W P S W R H I N I T Y A K A L M A N E E G L D N C K -  
ABC2 I V V A T T C M T A L R A I S A R P S T D S A S K V S E L I I S A T I M Y H G M I Q K P R M H P---W V W L W I D P M A Y S D A I L S N E H K I I P C V G  
PMR4 F S V L T T F M S M I R T I S A S R S L S Q L V P A V L I L M V I T G F V I P T R M L G---WSRWMN IDP VAYE S E T L I V N E H G R I P P C I P  
DEBHA V N F T L M S M L R T I G S S T K S L S Q M T P A S I L L L L T I T G F V I P T P K M L G---W C R W I N I L D P I G A Y E A L I V N E H G R D E C S -  
Y1ABC2 F S L L C T M M S M I R T I G S V T K T L E Q L P A S I I I L V I T G F S L P I S M H G---W R W I N W L N P V A Y E A V M V N E R N R E I C S -  
AGL142C V S L T A T V M S H L R S V S A C K T L V M P A S L L L L L A V V G F V I P Q K M I L G---W S R W L F L N P I R I M E M V A N E D O R I E C S -

820 830 840 850 860 870 880 890 900

PDR5 --E VPRFP--AY---ANISSTEVCIVVGI--VPG---QD VLDD IRGTQYTHKDKWRSGI MA VVFFTV LILCEIN  
CDR3 --NIVPSG--GY---P-KTGNVVC SIGI--LPG---E KVDGLYKLAN DSYSNVWRIFGLMA IILFGTTI FVQTN  
ABC1 --E VPR FEPG--GDLSGTRVCG VGS-VAG---QP VSGED LYSSTR ESANKWRIFGILIA MIF CSRWLPRPMC  
BOTCI PDQIVPSG---GVTNPEQVC STGA-EVG---SLVSG RLEQSFNRSRHLWRIFGIVL IIVT IATEVA  
CGR1 --T IPRG--AY---NDVTGTERVC SVGA-RPG---ND VLDD FLKESD EHKHKWRSGV MA VVFFTV LILCEIN  
PMR1 PESTIPAGD--SY---ADVRFN KICS KGA-VAG---QNVVSE IYTT SFQSN SHRWR MCMIG MVT MVT LVGTEI  
CDR1 --Q VPSGP--GY---ENISRSNQCVC VGS-VPG---NEMVSGTNYL GAYQYNSHKWRIFGIVL IILFTEIN  
PDR10 --Q I P S G P--N Y---V N T G E D V T C S L G S--I P G---N N V S G D D I Q T N Y S R H K K W R S V G I L A I I P L L I L F C E I N  
PDR12 --L V P S G P--G Y---E G I S I A N Q V C D A G I--V K G---N L V S G D S I L H Q Y H F A Y K H W R W G V I V W T F G I V P V I L S E L  
PDR15 --Q I P A G P--A Y---Q N I T G T Q R V C S V G A--Y P G---N D V L G D D F L K E S D E H K K W R S G I M A V V F F T V L I L C E I N  
ASPOR --Q I P A--Y---P N L S E N S V C S S A G--K A G---Q R I S G D D I Q V N I Q T Y S G H V W R I F G I L I A L V G M M I T I A T E L N  
AtrF P S Q L V P Q G P---G V D P R T Q E C L P G S--E L E---R R V S G S R L E E S F O T R S H L W R I F G V V I A T V L L I V T V L M E L  
AbcA --D V P S G--P G Y---T D V L N I R V C S T V R S--V P G---Q A I V N G N A T I E S A Y S T A S H K W R I G V I P A M L L G A V I V A T D I  
abcG10 D O T I P N G N Y I S N G S T M S Q D Q R C P S A G I--I E Q M V N G E F V A G S N Y I D A L D K S D D R T L V I I T L W W I F V I I M I A L E L  
abcG11 --E S I P Y G P A Y Q G--S E D A T R I C L P L G G I--E Q---G S L T K G D T M D K T L S P A T E M S Q N V I I V C W V T V V C M M A M E I  
ABC2 G P N I V P S G P---G P T D S G Q A C K V G S V P S---Q T V D D L L L--S L S Y S H S V W R N S G I W W W A V L V I T I F T T K W  
PMR4 A-NIVPSG--AY---D S T S M E R I C S T V G A--Q S G---S T D V S G T L V L E E S T G M T K H L W R I F G I L I A L L V M S T I L A T E I  
DEBHA --Q V P S G P--G Y---P T S G D S I I C S V G S--V A G---R D V T G D Y I N E Q T V T W S H R W R I W G I V A V V P F L V V H I M I C E I N  
Y1ABC2 --M V P S G G--A Y---E N V S L D R S C L V G I--E P G---L R V N E D I P I N Q S Y E T Y N H L W R M C I L G I I P F G A L P A V E I  
AGL142C --R M V P D S--F Y---E G F P I S I K V C L S V G I--V P G---Q S V M G T R I E T A Y S N T K K W M I W G I V L A Y A F F L A V L I L I E I N

910 920 930 940 950 960 970 980 990

PDR5 EG KQKGEILVFRSIVKRMKRGVLT EK--NAN---DPENVGER--SDLSSDRKMLQESSEESD-----TYG-  
CDR3 KSSISKGETLVFRRKNIRKMRKM--EE---DEEAYMDGMAPLDFSGSTEISDYSYDYM-----  
ABC1 ERKRSKGEVLFRRGQRPAAIKDAKT-----DPEAGPPKVGGA VVAANMT--GENAG-----  
BOTCI DPTGGGGALEFKRSKAAK-NKVKAE NAT-----PDEENS PASTSPVPTSGASSNTLEPPQE-----  
CGR1 EG KQKGEMLVFRSIVKRMKKEGKIRDK---TKMHTDKNDIENNS EITSNATNEKNMLQDTYDENAD-----SESI  
PMR1 SE KSKGEVLLFRRGYAPKNSGNSDG-----DVEQTHGVSSAEKKD GAGSGGEQESA-----  
CDR1 KG MOKGEIVLFLKGLSKLKKHKRKTAA SNKG---DIEAGPVAGKLDYQDEAEAVNNEKFTTEKG-----  
PDR10 EG KQNGEMLVFRSIVKRMKKGIVSEK KKKNOPTLSTDAEKDVE MNNNSSATDSRFLRDSDAAIMGNDKTVAK EHYSSPSSAS  
PDR12 KPVEGGGDL LLYKRGHMP ELGTEN-----ADARTASREEMMEALNGPNVDLEK-----  
PDR15 EG KQKGEMLVFRSIVKRIKQLKKEGKLEK---HRP---GDIENNAGSSPD SATTEKKILDD S--SEGSD-----SSSD  
ASPOR SSTSTAEVLVFRRGHEPAYLRDTSKK-----PDAESA VELSAMKPTTESGEGDMS-----  
AtrF SFVGGGGALVFRKSKRAK-KLATQT TQ---NDEEKVDVG---DKAALSRGEAM SASNGE-----  
AbcA TEKKPKGEILVFRGHKALKKGSDE-----DLEGGG---GRSATVEKIG--SDGLA-----  
abcG10 DWTSGGMPHKVYKRGKAPKIN-----DDEERQON-----AMVENATSK-----  
abcG11 DHTSGGYTHKVYKKGKAPKMN-----DVEEEKQON-----AIVAKATS N-----  
ABC2 KLSSENGPSLLIPREQSKLVNAVROVDEEG-----QVSSESGHVSEKD-DATVNAQSDNNSTDDTA-----  
PMR4 SEKRSKGEVLLFRRGYQPAHAAG-EG-----DLEKSSQPSAVAKTDES---TPSTT-----  
DEBHA KG MOKGEILLFRKALKKRRR---RN-----DIESGNIEKISP DYNNDNVTDNEMES-----  
Y1ABC2 QG KSKGEVLFVRKEHIKKORKEKNG-----DIESGVTMAGEKGTQESSES--SNTSI-----  
AGL142C KSMOKGEMAVLFRSTLKKIKKQNKKAIN-----CDIEFGNAPKESSTIGSDQRELIQR-----



NBD2 Walker A

|         | 1000  | 1010                  | 1020                   | 1030                                | 1040                          | 1050             | 1060 | 1070 |
|---------|-------|-----------------------|------------------------|-------------------------------------|-------------------------------|------------------|------|------|
| PDR5    | ----- | EIGLSKSEALFHWRLNLC    | EVQIKAEFRRILNNDV       | GWVKPGTTLTALMGASGAGKTTLLDCLAE       | RVTMGVIT-GDILVN               |                  |      |      |
| CDR3    | ----- | R-----                | KLLDTSNIFHWRNLTV       | VVKIKSEERVILNNDV                    | GWVKPGEVTALMGASGAGKTTLLNALS   | ERLTTGVITSGTRMVN |      |      |
| ABC1    | ----- | FIQRQTSTFGWRDVC       | EVQIKKETRRILDHVD       | GWVKPGTTLTALMGVSGAGKTTLLDCLAD       | RSMGVIT-GEMLVD                |                  |      |      |
| BOTCI   | ----- | ALKDITGSESVFTWENVE    | YVPIVGGERRILNNGV       | NGYKPGIMVVALMGASGAGKTTLLNLTLS       | QRQKTGVVT-GDMLVD              |                  |      |      |
| CGR1    | ----- | ITSGSRGGSPQVGLSKSEALF | HWQNLCDVPIKTEVRRILNNDV | GWVKPGTTLTALMGASGAGKTTLLDCLAE       | RTTMGVIT-GDMVNV               |                  |      |      |
| PMR1    | ----- | AIQRQTSIFQWODVC       | DVHIKNEERRILDHVD       | GWVKPGTCTALMGVSGAGKTTLLDVLAT        | RVTMGVVS-GEMLVD               |                  |      |      |
| CDR1    | ----- | STGSDVFPENREIFFWRDLTY | QVKIKKEDRVILDHVD       | GWVKPGQITALMGASGAGKTTLLNCL          | SERVTTGIITDGERLVN             |                  |      |      |
| PDR10   | ----- | SQSNFSFSKSDDELSKSQALF | HWKNLCDIPIKNGKRRILNNDV | GWVKPGTTLTALIGASGAGKTTLLDCLAE       | RTTMGLIT-GDVAVD               |                  |      |      |
| PDR12   | ----- | VIAEKDVFTWNHLDY       | TIPYDGA                | TRKLLSDVFGYVVKPKMTALMGESGAGKTTLLNVL | AQRINMGVIT-GDMLVN             |                  |      |      |
| PDR15   | ----- | DNAG-----             | LGLSKSEALFHWRLNLC      | DVPIKGGORRILNNDV                    | GWVKPGTTLTALMGASGAGKTTLLDCLAE | RVTMGVIT-GNIIVD  |      |      |
| ASPOR   | ----- | IIPPKDIFFTWRDVC       | DIETKGEPRRILDHVS       | GWVKPGTTLTALMGVSGAGKTTLLDVL         | AHRTSMGVIT-GDMVNV             |                  |      |      |
| AtrF    | ----- | SFKRISSSDRIFTWSNVE    | YVPIVNGTRKLLNNGV       | NGYAKPGVMIALMGASGAGKTTLLNLT         | LAQRQKMGVVT-GDFLVD            |                  |      |      |
| AbcA    | ----- | MIERQTALFQWKDVC       | DIKIKKENCRILDHVD       | GWVKPGILTALMGVSGAGKTTLLDVLAT        | RTTMGLIIS-GEMLVD              |                  |      |      |
| abcG10  | ----- | MKDILKMRSCFTWNH       | IHYTVQLNGKDLLLNDV      | EGWIKPGQMTALMGSSGAGKTTLLDVL         | AKRKTMGVVT-GKCLLN             |                  |      |      |
| abcG11  | ----- | MKDILHMDGGIFTWQ       | NIYRVKVGGERLLLDNIE     | GWIKPGQMTALMGSSGAGKTTLLDVL          | AKRKTMGVVE-GDSHLN             |                  |      |      |
| ABC2    | ----- | AQGNLIRNSSVFTW        | NLCYVTKIPSGDRLLDNV     | QGWVKPGNLTALMGSSGAGKTTLLDVL         | AQRKTBE                       | GIR-GSIQVD       |      |      |
| PMR4    | ----- | AIQRQTALFQWEDVC       | DIKIKGEPRRILDHVS       | GWVKPGTCTALMGVSGAGKTTLLDVL          | ATRTTMGVVT-GQMLVD             |                  |      |      |
| DEBHA   | ----- | KLPSAGDIFHWRELTY      | QVKIKSEERVILNNDV       | GWVKPGQVTALMGASGAGKTTLLNALS         | DRLTS                         | GVITSGTRMVN      |      |      |
| Y1ABC2  | ----- | LQAQRGLYQWKDVC        | DIKVKDEERRILNNDV       | GWVKPGTTLTALMGASGAGKTTLLDVL         | ADRKSTGVVT-GEMLVN             |                  |      |      |
| AGL142C | ----- | IGSDSIFHWRLNLC        | DIQIKNETRRILNNDV       | GWVKPGTTLTALMGYSGAGKTTLLDVL         | ANRVRVGVVT-GNIIVD             |                  |      |      |

Q Loop Signature

|         | 1080     | 1090       | 1100     | 1110      | 1120         | 1130      | 1140       | 1150       | 1160                          |                        |
|---------|----------|------------|----------|-----------|--------------|-----------|------------|------------|-------------------------------|------------------------|
| PDR5    | GIPRDKS  | FRSISGYC   | QQDLHLK  | TATVRES   | SLRFSAYLRQPA | EVSI      | EEKRYVEEVI | KILEMEKYA  | DAVVGV--AGEGLNVEQRKRLT        |                        |
| CDR3    | GGELDSS  | QRSISGYV   | QQDLHLE  | TSTVRE    | ALKSARLRQPN  | SVSIAEK   | DYVEKI     | IDLLEMRT   | VDAIVGV--PGEGLNVEQRKRLT       |                        |
| ABC1    | GHQRDAS  | FQRKTYGYV  | QQDLHLQ  | TTVRE     | ALNFSALLRQPA | HVPRAEK   | LAVDEVIR   | LLDMQEYA   | DAVVGV--PGEGLNVEQRKRLT        |                        |
| BOTCI   | GRPLGTAF | QRGTGFC    | QMDLH    | DTTIRE    | ALELSAILRQ   | HEVT      | RAEKI      | EYVDKI     | IDLLELQDMQDALVR-----SLSVQRKRV |                        |
| CGR1    | GRPRDTS  | FRSISGYC   | QQDLHLK  | TATVRES   | SLRFSAYLRQ   | PSSVSI    | EEKRYVE    | AVIKILEM   | ETYA                          | DAVVGV--PGEGLNVEQRKRLT |
| PMR1    | GRPRDQS  | FQRKTYGYV  | QQDLHLH  | TTVRE     | ALRFSAILRQ   | PRHVS     | HOEKLD     | YVEEVI     | KLGMETHYA                     | DAVVGV--PGEGLNVEQRKRLT |
| CDR1    | GHALDSS  | FQRSISGYV  | QQDVHLPT | STVRE     | ALQFSAYLRQ   | SNKIS     | KEKDDY     | VDYVID     | DLLEMTDYA                     | DAIVGV--AGEGLNVEQRKRLT |
| PDR10   | GRPRDQS  | FRSISGYC   | QQDLHLK  | TATVRES   | SLRFSAYLRQ   | DDVSI     | EEKDKY     | VEEVI      | EVLEMKLYA                     | DAIVGV--PGEGLNVEQRKRLT |
| PDR12   | AKPLPAS  | FNRS       | CGYVAQAD | NEMAE     | ELSVRES      | LRFAAEL   | RQSSVPLE   | EKRYVEKI   | IITLQMONYA                    | EALVGK--TCRGLNVEQRKRLT |
| PDR15   | GRRLDES  | FRSISGYC   | QQDLHLK  | TATVRES   | SLRFSAYLRQ   | PSSVSI    | EEKRYVEEVI | KILEM      | QOYSDAVGV--AGEGLNVEQRKRLT     |                        |
| ASPOR   | GRGLDQS  | FQRSTGYV   | QQDLHLE  | TATVRES   | SLRFSALLRQ   | PNVSI     | QEKDYVED   | VRMLK      | MEDEPA                        | EAIVGV--PGQGLNVEQRKRLT |
| AtrF    | GRPLGAD  | FQRGTGFC   | QMDLH    | DNSTIRE   | ALEFTSALLRQ  | DRNVSK    | QEKLDY     | VQIIDL     | LELNDIQDAIIG-----SLNVEQRKRV   |                        |
| AbcA    | QQRDES   | FQRKTYGA   | QQDLHLH  | TATVRE    | ALEFTSALLRQ  | SAHV      | PROEKIDY   | VEVI       | KLLDMTEYA                     | DAIVGV--PGEGLNVEQRKRLT |
| abcG10  | GKELNID  | ERITGYVE   | QMDVHNP  | GLTVRE    | ALRFSAKLRQ   | EPVSL     | ESLQDKRYVE | QVLEMMEM   | KHLGDALIG                     | SLTGTGISVEERKRLT       |
| abcG11  | GRELEID  | ERITGYVE   | QMDVHNP  | GLTVRE    | ALRFSAKLRQ   | EPVSL     | ESLQDKRYVE | QVLEMMEM   | KHLGDALIG                     | SLTGTGISVEERKRLT       |
| ABC2    | GRPLFVS  | QRSAGY     | CEQLD    | VEATATVRE | ALEFTSALLRQ  | PRDT      | PREEK      | LAVNTI     | IDLLELHDA                     | DTLIGE--VGAGLSVEQRKRV  |
| PMR4    | GNPTDQS  | FQRSTGYV   | QQDLHLH  | TSTVRE    | ALRFSAYLRQ   | PATV      | SRQEKI     | AYADEVI    | KLLGMEAYA                     | DAIVGV--PGEGLNVEQRKRLM |
| DEBHA   | GHELDAS  | FQRSISGYV  | QQDLHLQ  | TSTVRE    | ALRFSAYLRQ   | PSV       | PKSEK      | DYVDYI     | IRLLEMEKYA                    | DAVVGV--SGEGLNVEQRKRLT |
| Y1ABC2  | GEHRDGS  | FQRKTYGYV  | QQDLHAT  | TATVRES   | LEFTSALLRQ   | PSSI      | PESEK      | LAVDEVIR   | ILEMETYA                      | DAVVGV--PGEGLNVEQRKRLT |
| AGL142C | GHLRDT   | SFQRKTYGYC | QQDLHG   | RTQTVR    | DALKFSAYLRQ  | POSISRAEK | NAYVEDI    | IKLLGMEAYA | DAVVGV--TGEGLNVEQRKRLT        |                        |

Walker B D loop Switch Gly loop

|         | 1170       | 1180       | 1190     | 1200   | 1210     | 1220       | 1230        | 1240       | 1250     |               |               |            |
|---------|------------|------------|----------|--------|----------|------------|-------------|------------|----------|---------------|---------------|------------|
| PDR5    | IGVELTAK   | PKLLVFLDE  | PTSGLD   | SQTAW  | SICQLMK  | KLANHGQA   | ILCTIHQPSA  | ILMQE      | EDRLLFM  | QRGGKTVYFGDL  | EGGCKTMIDY    |            |
| CDR3    | I AVELVARE | KLLVFLDE   | PTSGLD   | SQTAW  | SICLIR   | KLANHGQA   | ILCTIHQPSA  | ILLEE      | EDRLLLLQ | KG-ETVYF      | GEFGANCHTLLEY |            |
| ABC1    | IGVELAAK   | PPLLVFLDE  | PTSGLD   | SQTAW  | ILDLE    | KLTKSQA    | ILCTIHQPSA  | MLFQ       | REDRLLFL | AKGGKTVYFGD   | IENSKIMIDY    |            |
| BOTCI   | IGVELAAK   | PNLLVFLDE  | PTSGLD   | SQSAYS | IVRFL    | KMLSAAGQA  | IVWSIHQPS   | SVLIQ      | QEDMILA  | LNPGGNTSYFG   | FPVGENGSAVVKY |            |
| CGR1    | IGVELAAK   | PKLLVFLDE  | PTSGLD   | SQTAW  | ATCQLMK  | KLANHGQA   | ILCTIHQPSA  | MLMQE      | EDRLLFL  | LQKGGQTVYFGD  | LKGGCKTMIKY   |            |
| PMR1    | IGVELAAK   | POLLVFLDE  | PTSGLD   | SQTSW  | SILDID   | LTKEGQA    | ILCTIHQPSA  | MLFQ       | REDRLLFL | LAKGGRTVYFGEI | GEHSSTLSNY    |            |
| CDR1    | IGVELVA    | KPKLLVFLDE | PTSGLD   | SQTAW  | SICL     | MRKLADHGQA | ILCTIHQPSA  | LIMQ       | EDRLLFL  | LQKGGRTAYFGEI | GENCQTMINY    |            |
| PDR10   | IGVELAAK   | PKLLVFLDE  | PTSGLD   | SQTAW  | STCQLMK  | KLADSRQA   | ILCTIHQPSA  | ILMQE      | EDRLLFL  | LQEGGQTVYFGD  | LKGGCKTMINY   |            |
| PDR12   | IGVELVA    | KPSLLVFLDE | PTSGLD   | SQSAYS | IVQFMR   | LADSSQA    | ILCTIHQPSA  | TLQ        | QEDRLLLL | LKGGKMYYFGD   | IGPNSBTLKY    |            |
| PDR15   | IGVELAAK   | PKLLVFLDE  | PTSGLD   | SQTAW  | DTCQLMK  | KLADHGQA   | ILCTIHQPSA  | ILMQE      | EDRLLFL  | LQKGGQTVYFGD  | LEGGCKTMIDY   |            |
| ASPOR   | IGVELAAK   | PKLLVFLDE  | PTSGLD   | SQSSWA | ICAP     | LRRLADSGQA | VLCTIHQPSA  | ILFQQ      | FDQLLFL  | LARGGKTVYFGPI | QNSNTLLNY     |            |
| AtrF    | IGVELAAK   | PSLLVFLDE  | PTSGLD   | SQA    | AFSIVRFL | KLKLSLGA   | ILCTIHQPS   | SMLIQ      | QEDMILA  | LNPGGNTFYFGP  | VHGGDGVIKY    |            |
| AbcA    | IGVELAAK   | POLLVFLDE  | PTSGLD   | SQTSW  | AILD     | LLDKLKN    | GQA         | ILCTIHQPSA | MLFQ     | REDRLLFL      | LQAGGRTVYFGEI | IQNSQILIDY |
| abcG10  | IGIELVAK   | PHI-LFL    | DEPTSGLD | SQSSYN | IVKIR    | KLADAG     | MPLVCTIHQPS | SVLE       | YEDRILL  | LAKGGKTVYFGD  | IEKSKTLTSY    |            |
| abcG11  | IGVELVAK   | PQI-LFL    | DEPTSGLD | SQSSYN | IKIR     | KLADAG     | MPLVCTIHQPS | SVLE       | YEDRILL  | LAKGGKTVYFGD  | IEKSKTLTSY    |            |
| ABC2    | IGVELVSK   | PSILIFL    | DEPTSGLD | SQSA   | YHTVRFL  | RKLAAV     | GQAVL       | VTIHQPSA   | QLFQ     | EDTLLLL       | LAKGGKTVYFGEI | GDQAKVVKEY |
| PMR4    | IGVELAAK   | POLLVFLDE  | PTSGLD   | SQTSW  | SILDIE   | LTKEGQA    | ILCTIHQPSA  | MLFQ       | REDRLLFL | LARGGRTIYFGEI | GENSSTLSNY    |            |
| DEBHA   | IGVELVA    | KPKLLVFLDE | PTSGLD   | SQTAW  | SICLIR   | KLADHGQA   | ILCTIHQPSA  | ILLQ       | EDRLLFL  | LQGGKTVYFGD   | LGDNQOTLIDY   |            |
| Y1ABC2  | IGVELAAK   | PPELLVFLDE | PTSGLD   | SQTAW  | SIVKLL   | KLKLANHGQA | ILCTIHQPSA  | ILFQ       | EDRLLFL  | LASGGRTVYFGD  | IQSSILLEY     |            |
| AGL142C | IGVELVAK   | PPELLVFLDE | PTSGLD   | SQTAW  | SICQLIK  | KLNVHGQA   | ILCTIHQPSA  | ILMQE      | EDRLLLL  | SNGGRTVYFGPI  | LEGGCKTMIQY   |            |



1260 1270 1280 1290 1300 1310 1320 1330 1340  
PDR5 AHKCPDANPAEWMLEVVGAAPGSHA--NQDYEVWRNSSEYRAVQSELDWMERELPKKG-----SITAAEDKHEFSSQSIITC  
CDR3 ASKCPQHANPAEWMLEVVGAAPGTQA--NQDYEVWRNSSEYRAVQNEHLHREEMPGLAS-----GEKEPDTNQATAASFWKC  
ABC1 GFPCPDHANPAEWMLEVVGAAPGTTS--DIDWHQAWRESPECADVHAELEDRLKEQVNTPT-----PPTEDKASVRETAAPFHQC  
BOTCI V-QCPPLKNVAEFILETAAKGGKRRDGGKINWNEEWNLSNENKTVMQEIVRIKSEROKIA-----APEASSQREKOSFVTLQ  
CGR1 AHKCPDANPAEWMLEVVGAAPGSHA--NQDYEVWRNSSEYRAVQNEHLHREEMKELSKKE-----LDNDEDANKEPATSLNVC  
PMR1 APKLSPDANPAEWMLEVVGAAPGTHS--DIDWPVAVWRNSSEYRAVQNHAELELNNLSLKP-----VATTDNDPAGFNEFANPFWVC  
CDR1 ADPCPKANPAEWMLEVVGAAPGSHA--KQDYEVWRNSSEYRAVQNEHLHREEMKELSKLP-----RDNDPEALLKYAAPLWVC  
PDR10 AHKCPDANPAEWMLEVVGAAPGTHA--SQDYFAIWRDSEYREMQKELDWMERELPKRT-----EGSSNEEQKEPATSTLVC  
PDR12 GMKCGVSENPAEVILNCIGAGATASV--NSDWHDLWLASPECAARAEEVEELHRTLPGRA-----VNDDEPLATRTAASVMPFC  
PDR15 AHKCPDANPAEWMLEVVGAAPGSHA--TQDYEVWRNSSEYRAVQNEHLHREEMKELNLPGRS-----KEPTAEHEKHPAASLVC  
ASPOR ARKADDEANPAEWMLEIVNAGTNSSE--ENWFDVWRNSSEYRAVQNEHLHREEMKELNLPGRS-----DKNDESWSKSEFAMPFWVC  
AtrF V-VCPFSKNVAEFILETAAKATTTKDGKKIDWNEEWRNSSEYRAVQNEHLHREEMKELNLPGRS-----VTETGSPYEFANSTMPFC  
AbcA APPCPDANPAEWMLEVVGAAPGSHS--SINWFEWRNSSEYRAVQNEHLHREEMKELNLPGRS-----FRTTSSGQKREKDSYREFAAPPWVC  
abcG10 VRSCTESENPAEVILEAIGAGTNPQV--STIDWPEVWRNSSEYRAVQNEHLHREEMKELNLPGRS-----DQDHGPPREPATSIWVC  
abcG11 VRPCTESENPAEYILEATGAGVHGKS--DVNWPEAWKQSPRELADISRELAALKKEGGAQQYKP-----RSDGPAREWSSQSTWVC  
ABC2 A-A-CPTENPAEHEMIDVVSQ--QLSQGK--DWDVWLASPEYANMTTELDRIDEAASKP-----PGTVDDGNEPATTLWVC  
PMR4 AHHLTPGENPAEWMLEVVGAAPGTHS--DIDWPKVWRNSSEYRAVQNEHLHREEMKELNLPGRS-----AAVDHPPEPATSIWVC  
DEBHA APKCPDANPAEWMLEVVGAAPGSHA--SQDYFDVWINSSEYRAVQNEHLHREEMKELNLPGRS-----KDDSPESMKTFAAPPWVC  
Y1ABC2 ADPCPKANPAEWMLEVVGAAPGSHA--KRDWPEVWVAESPERAEKRELEDEMARTVERVQTN--TTERDSTGYSDSDQVAVGWVVC  
AGL142C SQKPEACNPAEEMLEIIGAAPGSHA--LQDYHEIWKNSDEYQSVQEELEHRMEMELWHPK-----RFETSDQNKEPASSIWC

TMD2

1350 1360 1370 1380 1390 1400 1410 1420 1430  
PDR5 TKLVSIRLQQWRSPDLWSKFIITFNQLIGFTTFTKANTSLQQLQNCMLVFMVTVIIPNPILQQLPSPVQQRDLERERPSF  
CDR3 IIVVHRLQQWRTPSYIISKFMVLCSLNGFTTIKSONSMQLKQMLSIISMVVLTTLQQVPLVPTQRDLERERPSF  
ABC1 IYVPHRVQQWRTPSYIKALCVLPLIGFVYDPAINTQQQLQNCMLIIPNLTIVGQLVQQTMPHFVPTQRDLERERPSF  
BOTCI TTELEKRLTQWRDPSILKLTSTVILGPNFTWQLHRSIIDMQRMFTSLIILIPPTIVAVPKYQRLEWERLPSF  
CGR1 FQLVCVRLQQWRTPDLWSKFIITFNQLIGFTTFTKDHITLQLQNCMLSIIMTVIIPNPILQQLPSPVQQRDLERERPSF  
PMR1 LWQCLIRVQQWRTPSYISKFLCSLTLVGFSTFPHQNSMQQLQNCMLSIIMLMTIIPNLVQQLPSPVQQRDLERERPSF  
CDR1 PLLVSWRIVQWRSPSYISKIILVVSMLNGFSTFKKINMQQLQNCMLSPVMPPIPNLTLVQQLPSPVQQRDLERERPSF  
PDR10 IKLVSTRLHQWRTPSYLWSKFIITFNQLIGFTTFTKANTSLQQLQNCMLIIPNLTIVGQLVQQTMPHFVPTQRDLERERPSF  
PDR12 IKCVLRLTQWRDPSILKLTSTVILGPNFTWQLHRSIIDMQRMFTSLIILIPPTIVAVPKYQRLEWERLPSF  
PDR15 IKMVIIRLQQWRSPDLWSKFIITFNQLIGFTTFTKDRSLQQLQNCMLSIIMTVIIPNPILQQLPSPVQQRDLERERPSF  
ASPOR LQVTRVQQWRSPDLWSKFIITFNQLIGFTTFTKDRSLQQLQNCMLSIIMTVIIPNPILQQLPSPVQQRDLERERPSF  
AtrF TLLLTAKRIQQWRDPSYIKLVSVIIGPNFTWMLNSIIMQDRMSIIMLIMIPVVLNSIVPKYINRALWEAREYPSF  
AbcA LQVQCVRVQQWRSPSYISKFLCVLSLIVGFSLHTPNTIQQLQNCMLIIPNLTIVGQLVQQTMPHFVPTQRDLERERPSF  
abcG10 TWEV KRLLIWWRDMSYVIGIFTPQASGLIIGFTFWNLDLSSDMNQRPVIEILILEILYIIPQPLIQKATK-KDAS  
abcG11 TKEV KRLLIWWRDPSYIKLVSVIIGPNFTWMLNSIIMQDRMSIIMLIMIPVVLNSIVPKYINRALWEAREYPSF  
ABC2 IKLVQRMVSLRNDVYVWKLHISLWGFSTFWMKDSDLQKLKLTINNIYVAVLQCLPLIHRRI-RETRKSH  
PMR4 LLECLKRVQQWRTPSYIWSKFLCILTSLYIGFSTFPHQNSIQQLQNCMLSPVMPPIPNLTLVQQLPSPVQQRDLERERPSF  
DEBHA IKVIVQVQQWRTPSYISKVLSIIPSSLNPGFATKDKSLQQLQNCMLSPVMPPIPNLTLVQQLPSPVQQRDLERERPSF  
Y1ABC2 PKIVSKRQQWRTPSYLWSKVICASNIIGFSTFKKINMQQLQNCMLIIPNLTIVGQLVQQTMPHFVPTQRDLERERPSF  
AGL142C IIVSRRVQLQWRSPDLWSKFIITFNQLIGFTTFTKANTSLQQLQNCMLVFMVTVIIPNPILQQLPSPVQQRDLERERPSF

1440 1450 1460 1470 1480 1490 1500 1510  
PDR5 RTFSWISIPAQIVVEVPWNILAGTIATYIYYPISGYSNASAGQLHERSALWLFSCAFVYVSMGLLIVISFNQ--VESAHI  
CDR3 KTFSWLAIIAQITAEIPYQVLAITISFSPWYVPLRNQVYSGVTHRQVLMWMLMTLM IYSSTLQICISWNQ--LDVAANW  
ABC1 KVYSWKVMLSQIIVEIPWNSLIMVIMPCWYVPELERNILDOVTERSLFLWGLIETSTFTDLMIAGE--TAEAGGI  
BOTCI RIYQWVALCTANIVBIPIIVGVVITWLLWNPTELPSDS-----STSGVLMMLTFLQSWGQWICAFAP--SFTVISIV  
CGR1 RTFSWKVILQIVVEVPWNIVAGTILACITTYSVQYANASQAHQLHERSALWLFSCAFVYVSMGLLIVISFNQ--VETAHI  
PMR1 KTFSWQAMSAIIVLVEPWNILMSVLIICWYVPELQNAS--DDLHERSALMMLLILTMLTSTFTSMMIAGE--LAETGGNI  
CDR1 RTFSWPAIAGQITSEIPYQVETIAPTQWYVPLRNQVYSGVTHRQVLMWMLMTLM IYSSTLQICISWNQ--LDVAANW  
PDR10 RTFSWKAVIVSQIIVEIPWILLAGTIATYIYYPISGYSNASAGQLHERSALWLFSCAFVYVSMGLLIVISFNQ--VETAHI  
PDR12 NTFHWSVLLCHAVEHWSTLQCMCICWPAQPSGRAS-----HGFTEFPVLIPLVTVYLVMLMSP--DVPSAMI  
PDR15 RTFSWLAIFLSQIIVEIPWILLAGTIATYIYYPISGYSNASAGQLHERSALWLFSCAFVYVSMGLLIVISFNQ--VETAHI  
ASPOR KTFSWKAMLIAMIVVEIPYQIMMILTACITTYAVVVDSE-----RQGLVLLCQITVYVSTFTSMMIAGE--DTETASAI  
AtrF RIYQWVALCTANIVCEIPMIVSSLIYVLLWYVPSPTDS-----STAGVLMMLTFLMSSWGQWICAFAP--SFTVISIV  
AbcA KTFSWKAVLIAMIVVEPWNILMSVLMICWYVPIELRNQEPTDVHLRQTMWMLMWTLLFSSTFTSMMIAGE--LAETGGNI  
abcG10 KTFSWCPEAISIVVEIPYVACTICPTCSWTAQITYNG-----EDFYIITILLCVSLQVVSACFC--NVMLAQTI  
abcG11 KTFSWPEAISIVVEIPYVISEIETICSWTAQLEHKTSD-----DEQTYEYWIIMMTCVSEGOVMVQI--NMFTAMLI  
ABC2 KTFSWLIVTLIVSEIPYLVCAVTVCVWYVTVQPSDS-----HRAGCTFVMLCBLTQMCQIILAPAEVIVLAMI  
PMR4 KTFSWKAMISILVVEPWNILMAMLMPCWYVPIELRNQEPTDVHLRQTMWMLMWTLLFSSTFTSMMIAGE--LAETGGNI  
DEBHA RTLSWFATITAGITAEIPWQIASOTLAPTQWYVPLRNQVYSGVTHRQVLMWMLMWTLLFSSTFTSMMIAGE--LDVAANW  
Y1ABC2 KTFSWQVMGSIIMVVELIQPTMIVVIVTCFYVPEQWTEYDSEVHERSGLTFLVLLLYNSTFHMILI--NKDTAAQI  
AGL142C KTFSWKVLLSQITAEIPWILGATISEICWYVPEQYTHATAARERSELWSLCAVAFIFSATERQCIAGLE--KEPAHII



|         | 1520             | 1530     | 1540    | 1550 | 1560 | 1570 | 1580    | 1590    | 16      |      |     |      |      |     |     |    |      |     |   |   |
|---------|------------------|----------|---------|------|------|------|---------|---------|---------|------|-----|------|------|-----|-----|----|------|-----|---|---|
| PDR5    | SAANLASLLPTMSLS  | CGVMTTPS | MPR     | WI-  | M    | RVSP | PLTYFIQ | LL      | VEV     | NVDV | KCD | ELLE | TP-- | PSG | MT  | CQ | MEP  | LG  |   |   |
| CDR3    | YAAWISLLLTISMI   | CGVI     | TKDSMPK | WV-  | L    | RCP  | PLTALTS | MMS     | IGL     | DS   | VKC | APTE | ILTP | PPQ | TPV | -  | QK   | OD  | M |   |
| ABC1    | AGGIANLPTSLCLI   | CGVL     | NPD     | MPR  | WI-  | M    | RVSP    | PTTIVS  | LL      | SV   | VAN | SEV  | RC   | SN  | EL  | LD | DP-- | LN  | C |   |
| BOTCI   | VISHVLPPTTFVM    | GL       | FGV     | VRP  | ISQ  | ISV  | WRW     | LFV     | VNP     | AT   | YWI | GGII | ATLS | N   | VPI | EC | SN   | EA  | Y |   |
| CGR1    | TAAHIGSLMPTM     | LS       | CGVM    | TPD  | MPR  | WI-  | M       | RVSP    | PLTYLID | LL   | ST  | GV   | N    | VD  | IR  | CS | N    | TEL | V |   |
| PMR1    | TGGNLANLLPTSLCLI | CGVL     | TPDK    | MPH  | WI-  | M    | RVSP    | PTLVLS  | ML      | ST   | GT  | SG   | K    | V   | EC  | S  | V    | ELL | H |   |
| CDR1    | NAANLATLLPTMCLN  | CGVL     | QPD     | VLP  | WI-  | M    | RCP     | PTLVQ   | ML      | ST   | GL  | NT   | V    | K   | C   | ER | E    | V   | S |   |
| PDR10   | NAANLASLLPTMSLS  | CGVL     | TPN     | ILP  | WI-  | M    | RVSP    | PLTYLID | LL      | SV   | GL  | AN   | S    | V   | C   | SS | N    | ELL | K |   |
| PDR12   | SASMINSLFL       | MLL      | CGIL    | QPRE | KMP  | WRR  | RLM     | N       | V       | S    | P   | T    | V    | V   | Q   | L  | V    | T   | P |   |
| PDR15   | TAAHIGSLMPTM     | LS       | CGVM    | TPK  | VMP  | WI-  | M       | RVSP    | PLTYMID | LL   | LG  | V    | N    | VD  | V   | K  | C    | S   | N |   |
| ASPOR   | TAS              | I        | V       | V    | L    | L    | M       | S       | L       | T    | C   | G    | V    | M   | T   | P  | L    | P   | E | W |
| AtrF    | VISHVLPPTTFVM    | CGV      | IVR     | PRD  | PV   | WK   | W       | M       | V       | N    | P   | V    | W    | L   | R   | V  | I    | S   | S |   |
| AbcA    | NAGLGNLLPTLCLL   | CGVL     | TPD     | QLP  | WI-  | M    | RVSP    | PTLVLS  | ML      | S    | V   | G    | I    | S   | N   | T  | N    | V   | I |   |
| abcG10  | LAAQILPPLLVLML   | L        | CGVL    | VY   | EQ   | IP   | N       | FW      | K       | V    | H   | S    | N    | P   | C   | R  | F    | L   | E |   |
| abcG11  | PMILPLPLIV       | LPL      | CGVM    | V    | P    | P    | S       | S       | I       | P    | T   | W    | R    | W   | V   | H  | N    | P   | C |   |
| ABC2    | VLAN--           | P        | V       | V    | I    | G    | L       | V       | S       | CG   | S   | V    | L    | V   | P   | T  | Q    | I   | Q |   |
| DEBHA   | TGGNLANLLPTSLCLI | CGVL     | TKE     | MPE  | WV-  | M    | RVSP    | PTLVLS  | ML      | ST   | GT  | V    | S    | G   | AD  | V  | C    | E   | V |   |
| Y1ABC2  | NAANLASLLPTMCLT  | CGIL     | SSD     | SMPR | WI-  | M    | RCP     | PTLVLS  | ML      | S    | V   | L    | S    | V   | A   | L  | S    | D   | V |   |
| AGL142C | PAAILANVPTMCLIF  | SG       | V       | L    | V    | K    | L       | P       | R       | WI-  | W   | M    | L    | S   | P   | V  | T    | L   | V |   |

|         | 1610   | 1620 | 1630 | 1640  | 1650 | 1660 | 1670 | 1680 |   |
|---------|--------|------|------|-------|------|------|------|------|---|
| PDR5    | -----L | KTG  | LT   | DEN-- | T    | D    | C    | S    | F |
| CDR3    | -----I | AG   | G    | LL    | N    | PE-- | T    | D    | C |
| ABC1    | -----S | T    | T    | I     | P    | G    | L    | R    | I |
| BOTCI   | -----S | A    | G    | V     | G    | L    | T    | N    | P |
| CGR1    | -----V | A    | G    | T     | G    | L    | T    | D    | P |
| PMR1    | -----G | L    | V    | V     | N    | G    | T    | Q    | V |
| CDR1    | -----F | A    | G    | G     | P    | E    | T    | R    | N |
| PDR10   | -----S | T    | G    | T     | G    | L    | L    | D    | S |
| PDR12   | -----N | N    | T    | G     | L    | V    | N    | P    | T |
| PDR15   | -----L | A    | G    | T     | G    | L    | S    | D    | P |
| ASPOR   | -----M | A    | G    | G     | Q    | L    | S    | N    | P |
| AtrF    | -----I | K    | N    | G     | L    | L    | N    | P    | D |
| AbcA    | -----N | L    | G    | G     | L    | A    | D    | E    | M |
| abcG10  | -----Y | G    | I    | V     | R    | V    | I    | K    | D |
| abcG11  | -----K | P    | S    | G     | V    | E    | S    | A    | T |
| ABC2    | -----P | S    | V    | D     | L    | I    | N    | P    | S |
| PMR4    | -----V | A    | G    | G     | L    | Q    | N    | P    | M |
| DEBHA   | -----F | A    | G    | G     | L    | I    | S    | D    | N |
| Y1ABC2  | -----G | S    | A    | G     | L    | V    | S    | S    | A |
| AGL142C | -----N | A    | E    | S     | V    | L    | L    | N    | P |

### Supplementary Figure S2

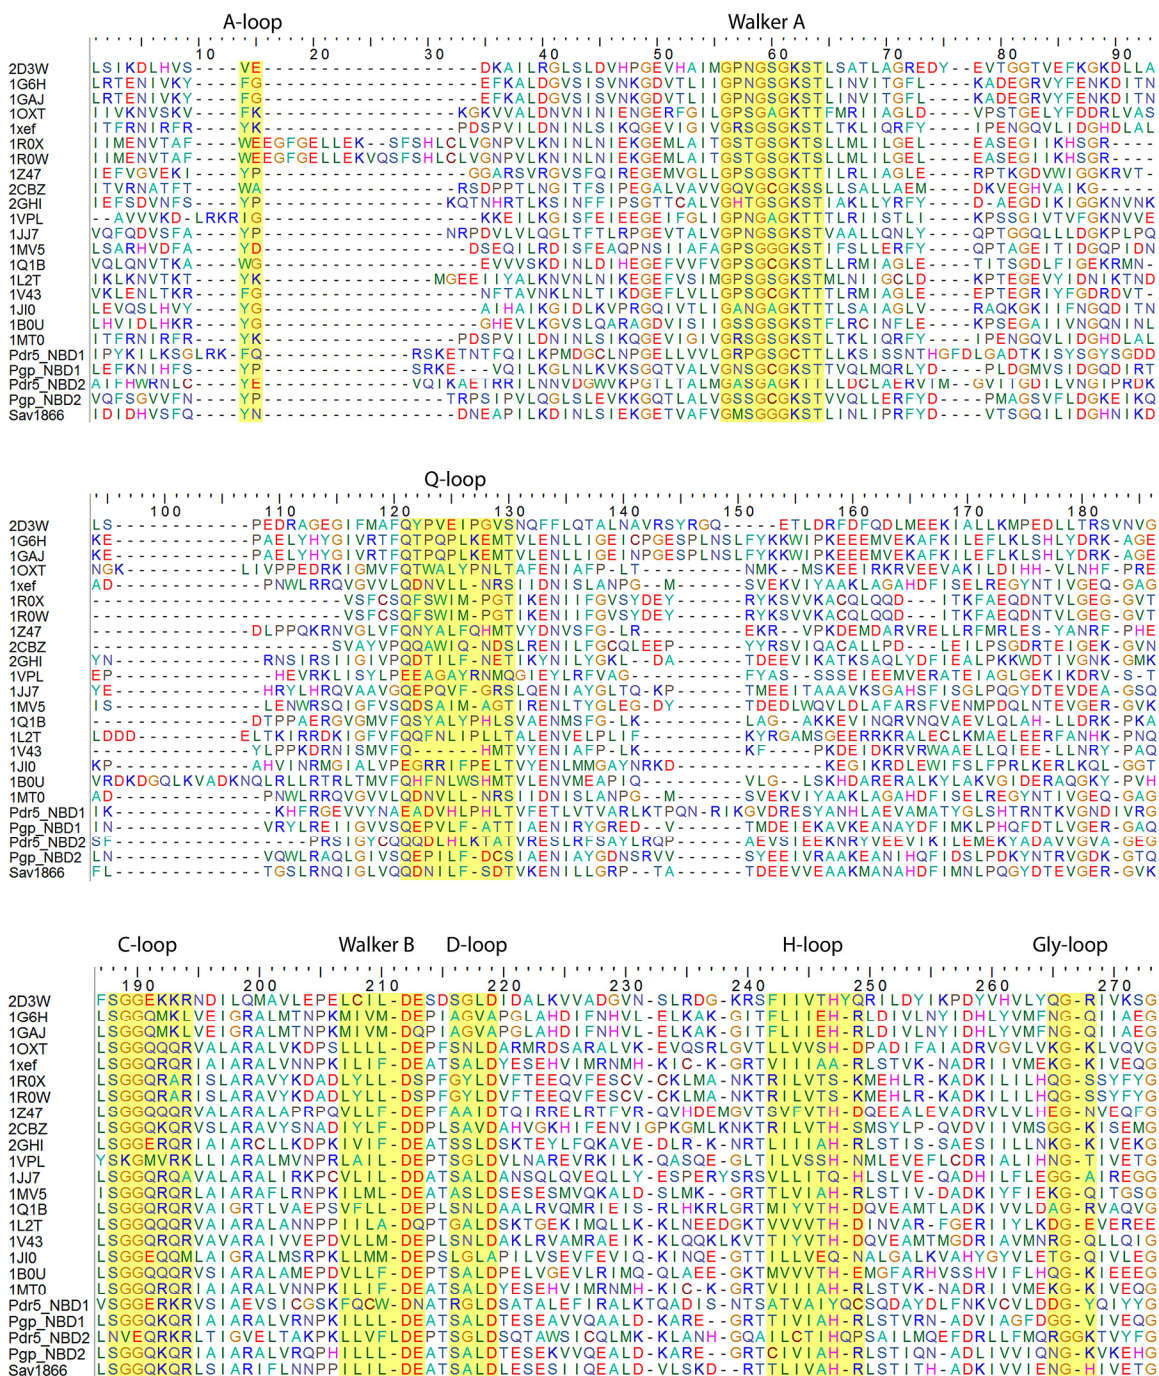

# Sav1866: Hydrophobicity Profiles

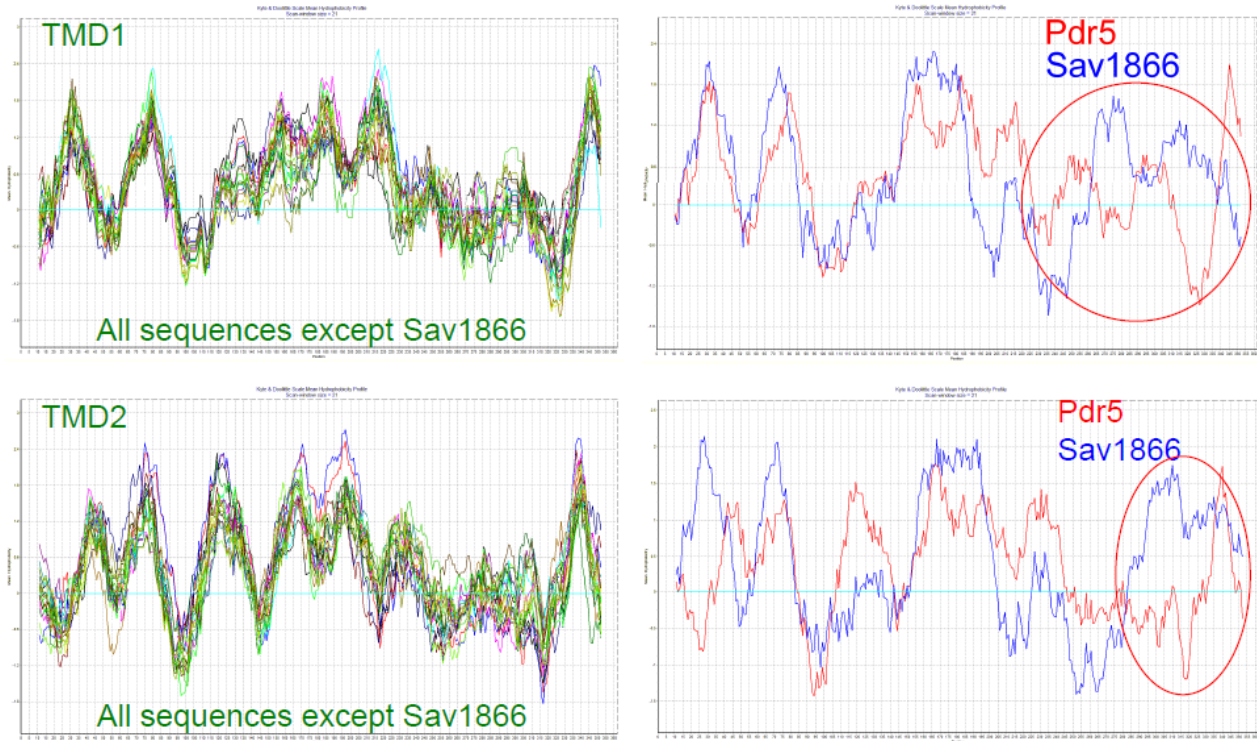



Supplementary Figure S4

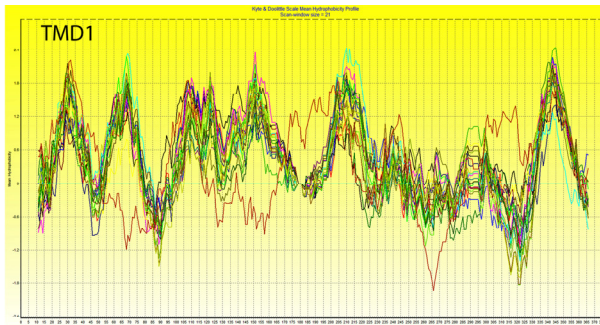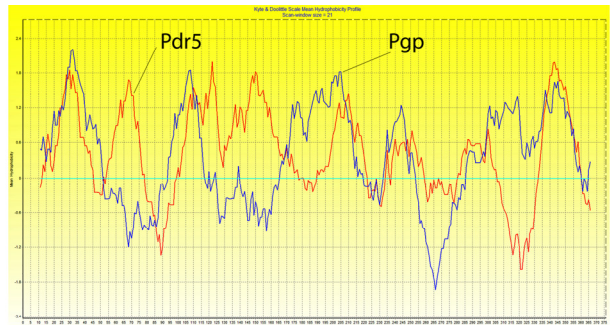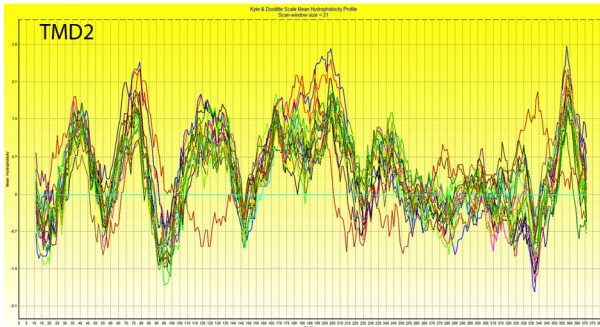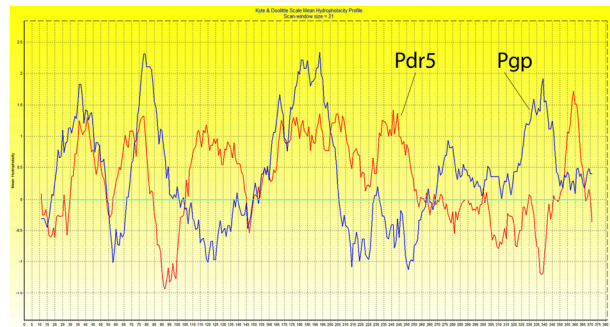

Supplementary Figure S5

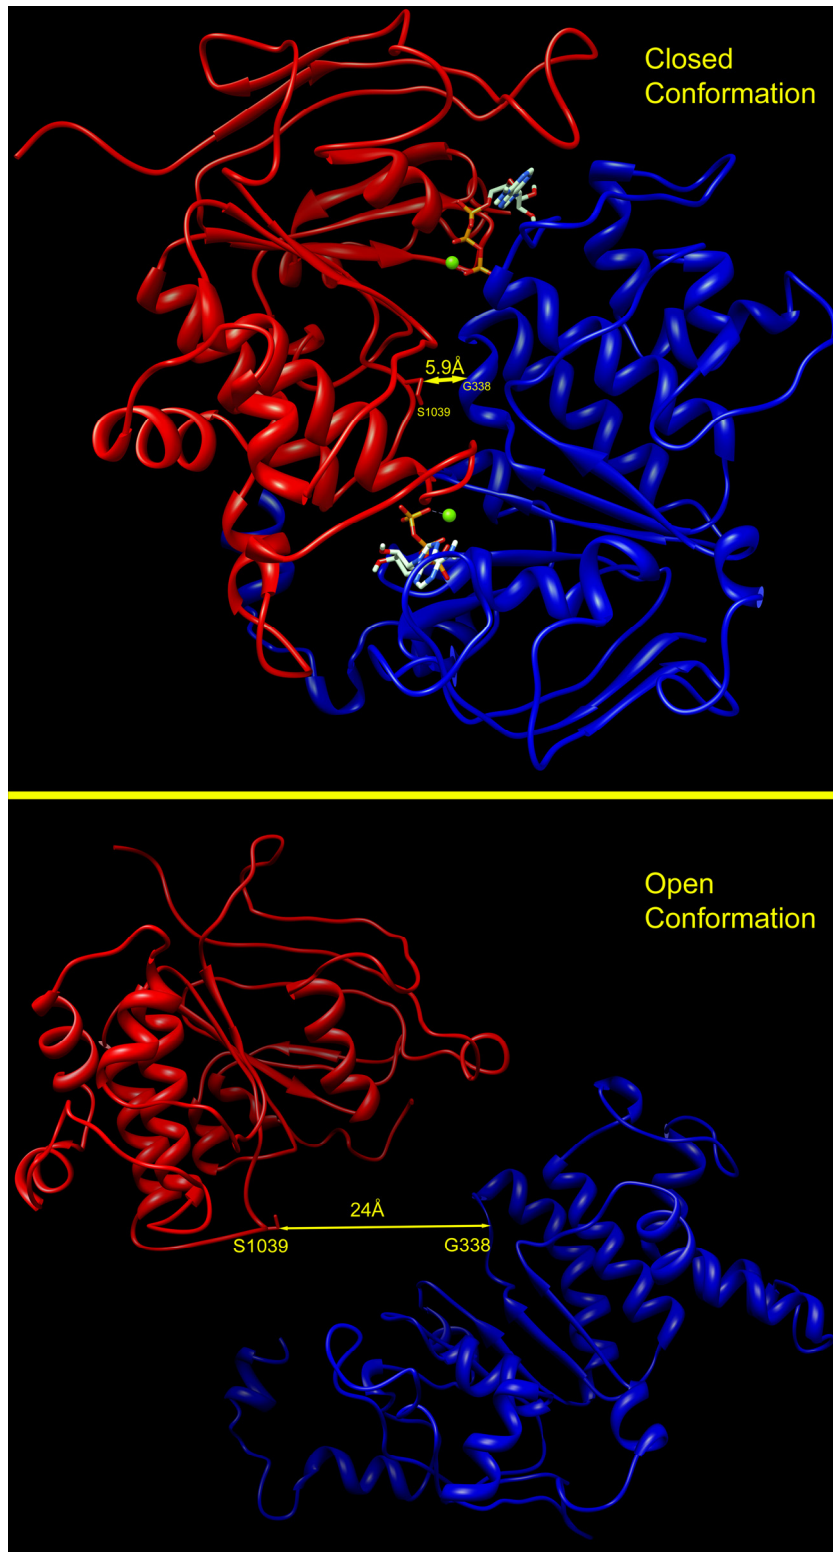

Supplementary Figure S6

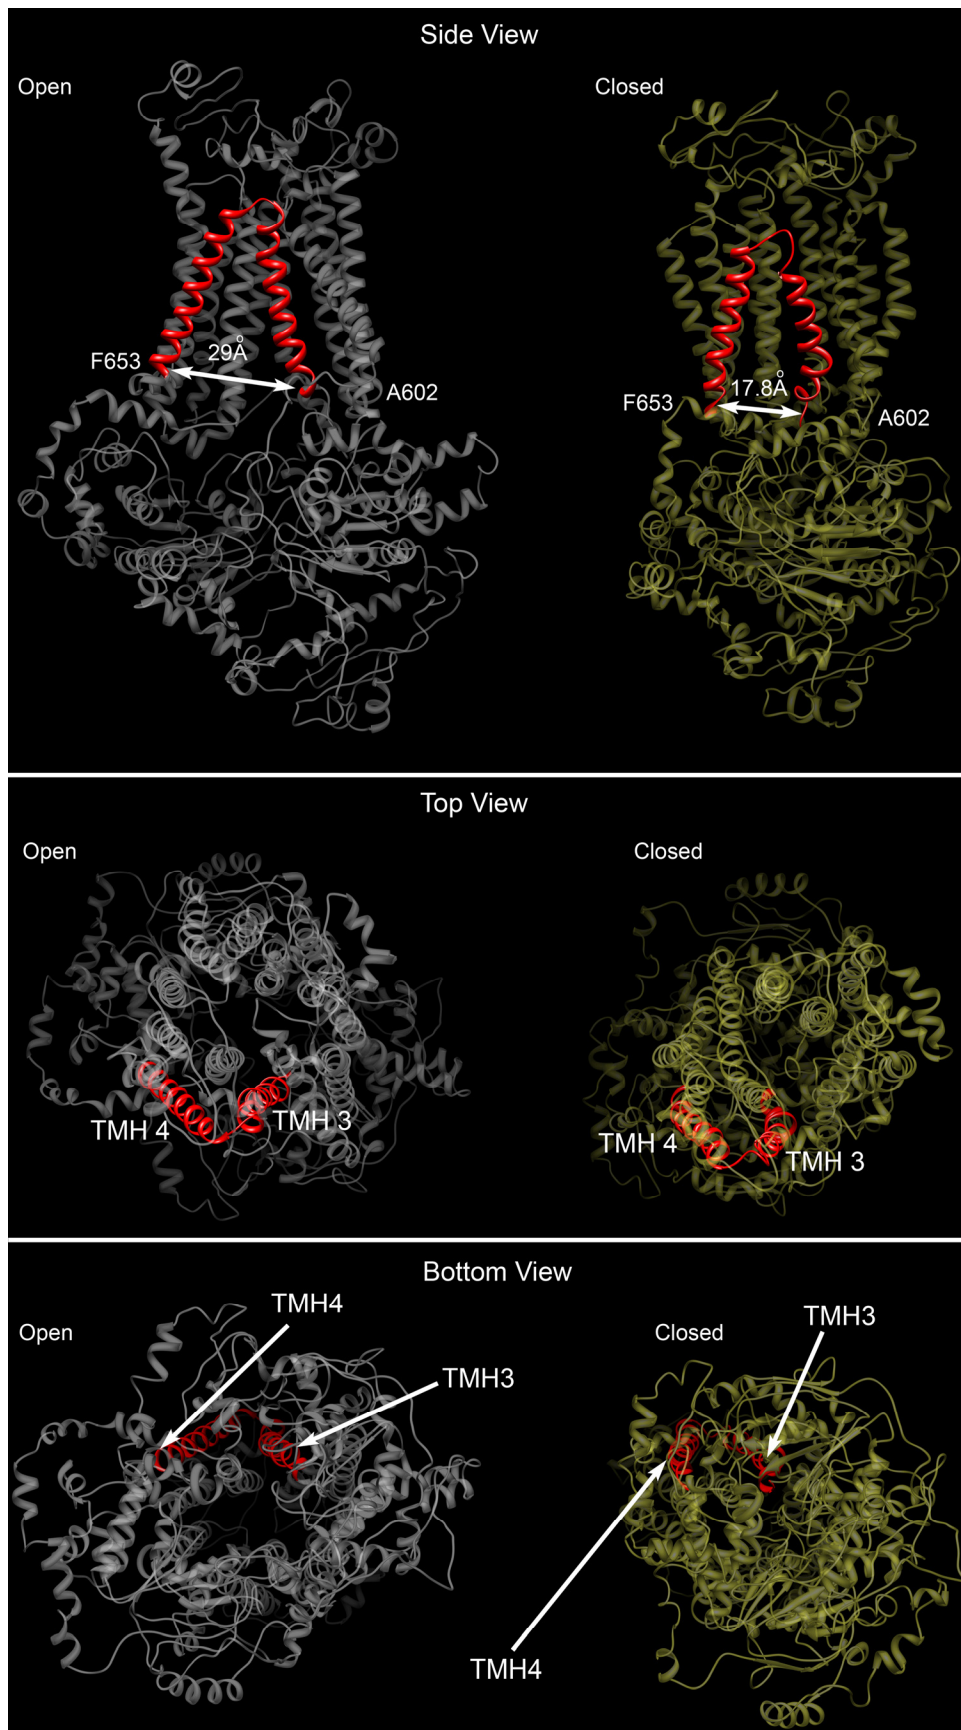



Supplementary Figure S7

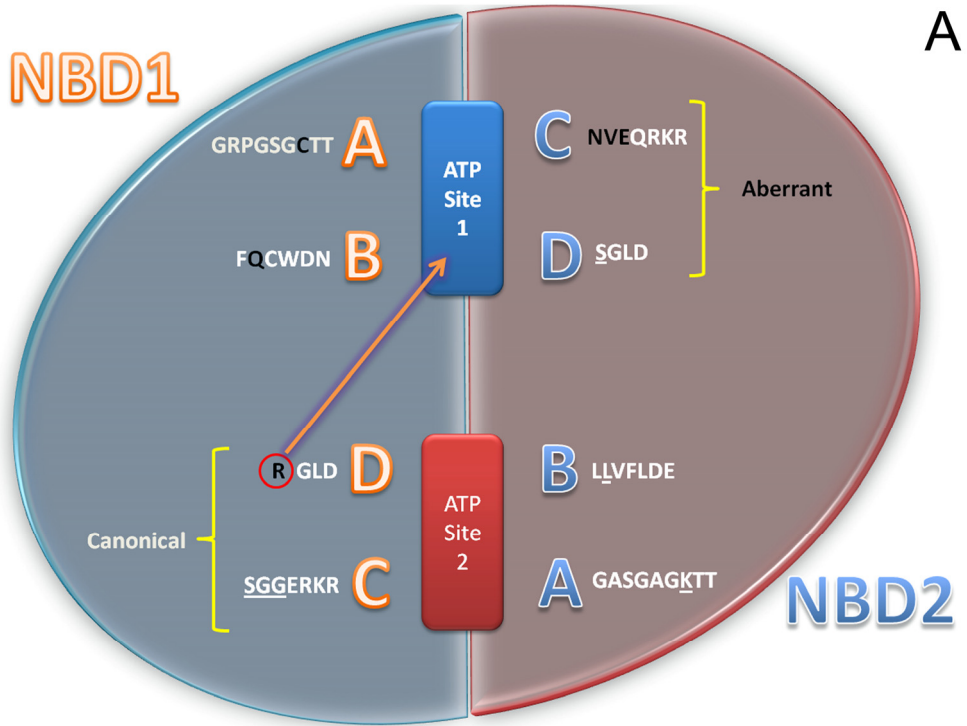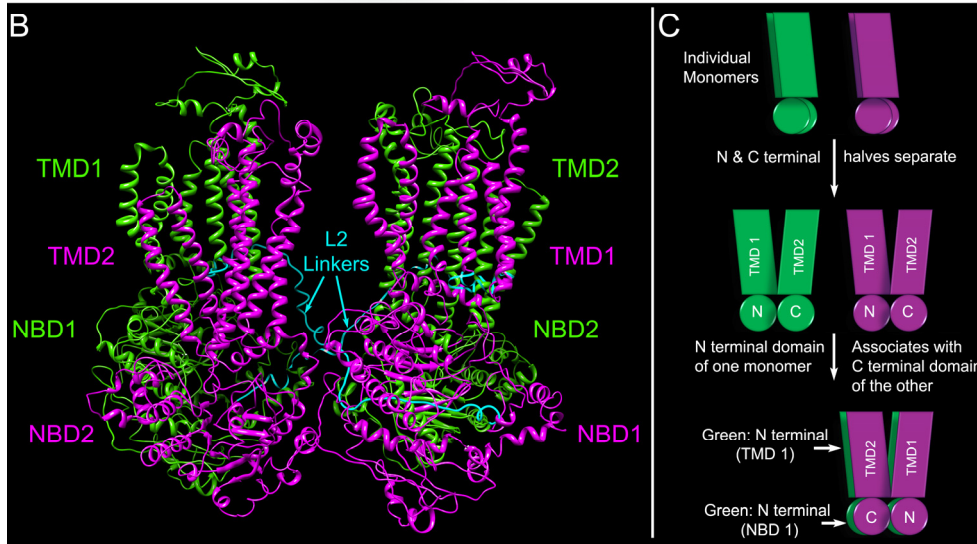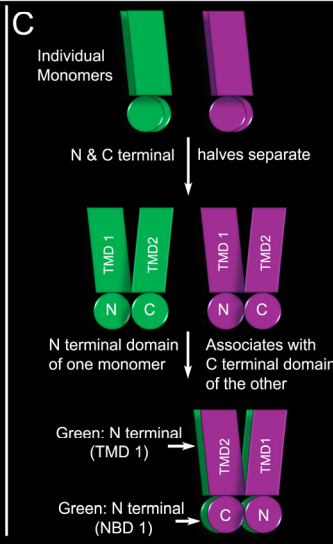

Supplementary Figure S8

A

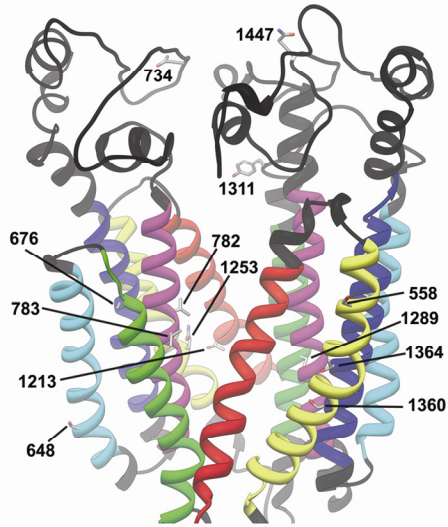

B

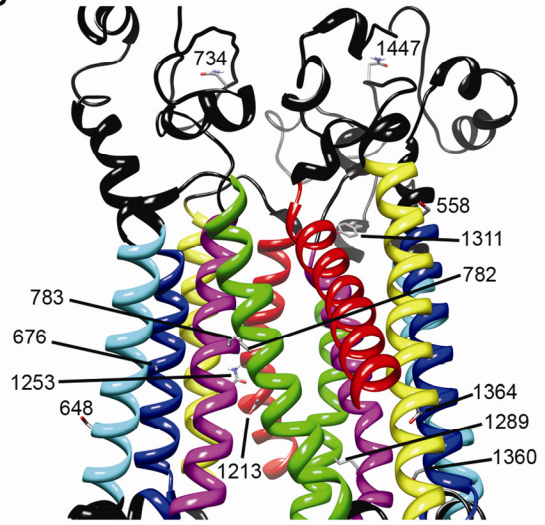

Supplementary Figure S9

TMD1

```

PDR5 10 20 30 40 50 60 70 80
Pgp  MQVKYLLIRNWRRLRNNIGFTLFMI LGNC SMALILGSMFFKIMKKGD--TSTFYFR
      VSVLTMFRYAGW-LDRLYMLVGTLAAIIHGVALPLMMLIFGDM-TDSFASVGNVSKNSTNMS
      EADKRAMFAKLEEEEMTTYAYYY

PDR5 90 100 110 120 130 140 150 160
Pgp  -GSAMFFAILFNAPSSLLEIFSLYEARPITEKHRTYSLSYHPSADAFASVLSLEIPS-
      TGI GAGVLIVAYIQVSWFCLAA-GRQIHKI-RQK-FFHAIMNQEIG--WFDVHDV
      GELNTRLTDDVSKINEGIGDKIGMFFQA

PDR5 170 180 190 200 210 220 230 240 250
Pgp  IIAVCFNIIFYFLVDFRRNGGVFFFYLLINIVAVFSMS--HLF--RCVGSLT-
      MATFFGGFIIGFTRGWKLTLVILAISPVLGLSAGIWA-KILSSFIDKELHAYAKAGAVA
      EEVLAAIRTVIAFGGQKKELEERYNN

PDR5 260 270 280 290 300 310 320 330
Pgp  ---KTLSEAMVPASMLLLALSMTGFAIPKKKILRWKWIWYINPLAYLFESLLINEFHGI
      NLEEKARLGIKKAITANISMGAFFLLIYASYALAFWYGTSLVI--
      KFPCA EYVPRGPAYA

PDR5 340 350 360 370 380 390 400
Pgp  NISSTESVCTVVGAVPGQDYVLGDDFIRGTYYHDKDKWRGFGIGMAYVVFVYLF
      LCEYNEGAK
      SKEYSIGQVLTVFFSVLIGAFVSGQASPNIE
  
```

TMD2

```

PDR5 10 20 30 40 50 60 70 80
Pgp  LVSIRLFQQYWRSPDYLWSKFILTIFNQLFIFGFTFF--KA----GTSLQGLQNQ-MLAV
      FMFTVIFNPILQQ-YL-PSF
      WRILKLNSTEW--PYFVVGFICAIINGGLQPAFSVIFSKVVGVFTNGGPPETQRQNSN
      LFSLLFLILGIIISFITFFLQGGFT

PDR5 90 100 110 120 130 140 150 160
Pgp  VQQRDLYEARERPSRTFSWIS-
      FGKAG--EILTKRLRYMFKSMLRQDVSWFDDPKNTTGALTTRLANDAAQVKGATGSR
      LAVIFQNIANLGTGIIISLIYGW

PDR5 170 180 190 200 210 220 230 240
Pgp  FYSNASAAQGLHERGALFWLFSCAFYVYVGSMLLVISFNQVAE-
      Q-----LTLLLLAIVPIIAIAGVVEMKMLSGQALKDKKELEGSCKIATEAIE
      ENFRVTVVSLTREKQFETMYAQ

PDR5 250 260 270 280 290 300 310 320
Pgp  ---SAANLASLLFTMSLSFCGVMTPPSAMPFRWIFMYRVSPITYFIQALLAVGVAN
      DVKCADYELELFTPPSG
      SLQIPYRNAMKKAHVFGITFSFTQAM--MYFSYAAAFRFGAYLVTTQLMTFENVLLV-

PDR5 330 340 350 360 370 380 390 400
Pgp  MTCGQYMEPYLQLAKTGYLTDENATDTCSFQCI STTNDYLANVNSFYSERWRNYGIF
      ICYIAFNFIAGVFFYWLARVPKKN
      FSAIVFGAMAVGQVSSFPDYAKATVSA
  
```



Supplementary Figure S10

TMD1

```

PDR5 10 20 30 40 50 60 70 80
2HYD 10 20 30 40 50 60 70 80
M Q V K Y L L I R N M W R L R N - N I G F T L F M I L G N C S M A L I L G S M F F K I M K K - - G D T S T F - - - - Y F R G S A M F F A I L F N A F S S
M I K R Y L - - - Q F V K P Y K Y R I F A T I I V G I I K F G I P M L I - P L L I K Y A I D G V I N N H A L T T D E K V H H L T I A I G I A L F I F V I R P P - -

PDR5 90 100 110 120 130 140 150 160
2HYD 90 100 110 120 130 140 150 160
L L E I F S L Y E A - - - - R P I T E - K H R T Y - - - - S L Y H P - - S A D A F A S - - - - V L S E I P S K L - - I I A V C F N I I F Y F
- I E F I R Q Y L A Q W T S N K I L Y D I R K K L Y N H L Q A L S A R F Y A N N Q V G Q V I S R V I N D V E Q T K D F I L T G L M N I W L D C I T I I A L S I M F

PDR5 170 180 190 200 210 220 230 240
2HYD 170 180 190 200 210 220 230 240
L V D F R R N G G V F F F Y L L I N I V A V F S M S H L F - R C V G S L T K T -
F L D V K L T - L A A L F I F P F Y I L T V Y V F F G R L R K L T R E R S Q A L A E V Q G F L H E R V Q G I S V V K S F A I E D N E A K N F D K K N T N F L T R A L

PDR5 250 260 270 280 290 300 310 320
2HYD 250 260 270 280 290 300 310 320
- - - - - L S E A M V P A S M L L L A L S M Y T G F A I P K K K I L R - - - W S K W I W Y I N P L A Y L F E S L L I N E F H G I K F P C A - - E Y
K H T R W N A Y S F A A I N - T V T D I G P I I V I - G V G A Y - - L A I S -

PDR5 330 340 350 360 370 380 390 400 41
2HYD 330 340 350 360 370 380 390 400 41
V P R G P - - A Y A N I S S - - - T E S V C T V V - G A V P - G - - - Q D Y V L G D D F I R G T Y Q Y Y H K D K W R G F G - I G M A Y V V F F F V Y L F L C
- - - - - G S I T V G - - - - - T L A A F V G Y L E L L F G P L R R L - V A

```

TMD2

```

PDR5 10 20 30 40 50 60 70 80
2HYD 10 20 30 40 50 60 70 80
F S Q S I I Y Q T K L V S I R L F Q Q Y W R S P D Y L W S K F I L T I F N Q L F I G F T F F - - - - K A G - - - - - T S L Q G L Q N Q M - L A V F M F
M I K R Y L Q F V K P Y K - - - - - Y R I F A T I I V G I I - - - K - F G I - P M L I P L L I K Y A I D G V I N N H A L T T D E K V H H L T I A I G I A L F I F

PDR5 90 100 110 120 130 140 150 160
2HYD 90 100 110 120 130 140 150 160
T V I F N P - - I L Q Q Y L P S F V Q Q R D L Y E A R E R P S R T F S W I S - - - - - F I F A Q I F V E V P W N I L
V I V R P P I E F I R Q Y L A Q W T S N K I L Y D I R K K L - - - Y N H L Q A L S A R F Y A N N Q V G Q V I S R V I N D V E Q T K D F I L T G L M N I W L D C I T I I I

PDR5 170 180 190 200 210 220 230 240 250
2HYD 170 180 190 200 210 220 230 240 250
A G T I A Y F I Y Y Y P I G F Y S N A S A A G Q L H E R G A L F W L F S C A F Y V Y V G S M G L L V I S F N Q V A E S -
A L S I M F F L - - - - - D - - - - - V K L T L A A L F I F P F Y I L T V Y V F F - - - - - G R L R K L T R E R S Q A L A E V Q G F L H E R V

PDR5 260 270 280 290 300 310 320 330
2HYD 260 270 280 290 300 310 320 330
G G I S V V K S F A I E D N E A K N F D K K N T N F L T R A L K H T R W N A Y S F A A I N T V T D I G P I I V I G V G - A Y -

PDR5 340 350 360 370 380 390 400 410 42
2HYD 340 350 360 370 380 390 400 410 42
V G V A N V D V K C A D Y E L L E F T P P S G M T C G Q Y M E P Y L Q L A K T G Y L T D E N A T D T C S F C Q I S T T N D Y L A N V N S F Y S E R W R N Y G I F I C Y I
- - - - - L A I S G S I - - - - - T V G T - - - - - L A A F V

PDR5 0 430 440
2HYD 0 430 440
- A F N Y I A G V F F Y W L A R V P K K N G K L S K K
G Y L E L L F G P L R R L V A S F T T L T Q S F A S M

```

Supplementary Figure S11

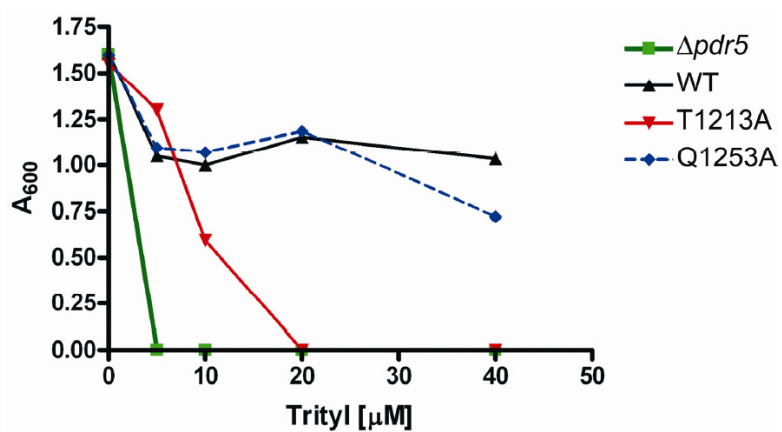

Supplementary Figure S12

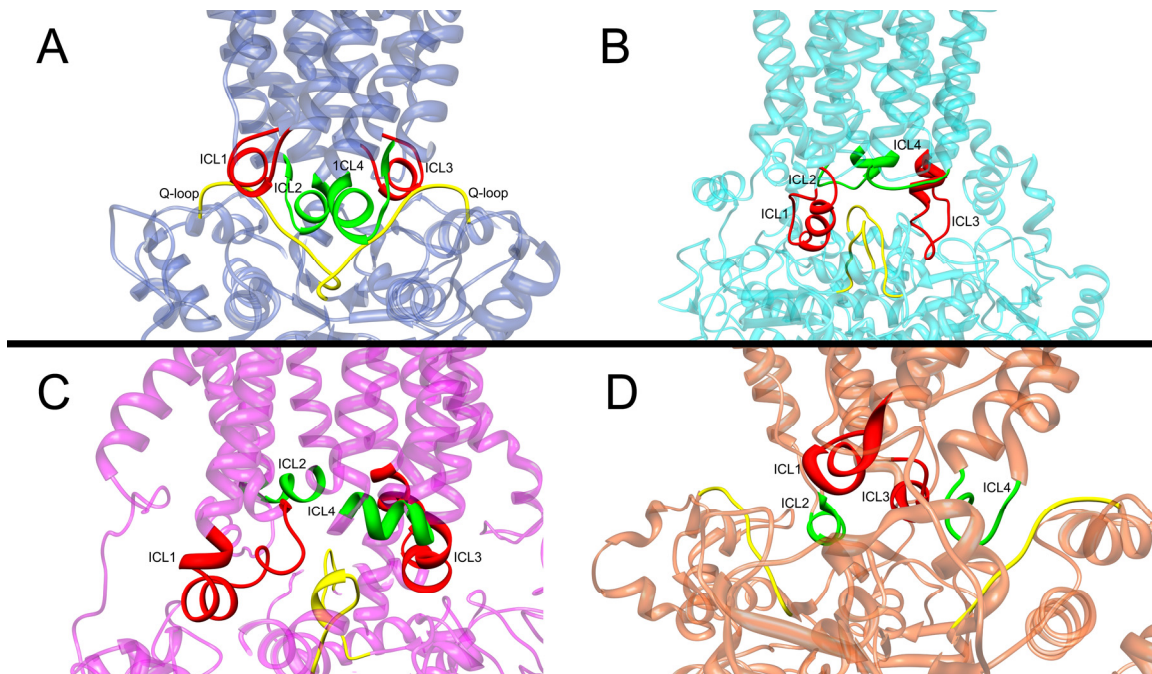

Supplement: NIHMS253663-supplement-01.pdf [file NIHMS253663-supplement-01.pdf]
